# Supplementary material
Source: PubMed Central journal article supplement (PMC4844228)
Supplement: NIHMS550106-supplement-Supplemental.pdf [file NIHMS550106-supplement-Supplemental.pdf]

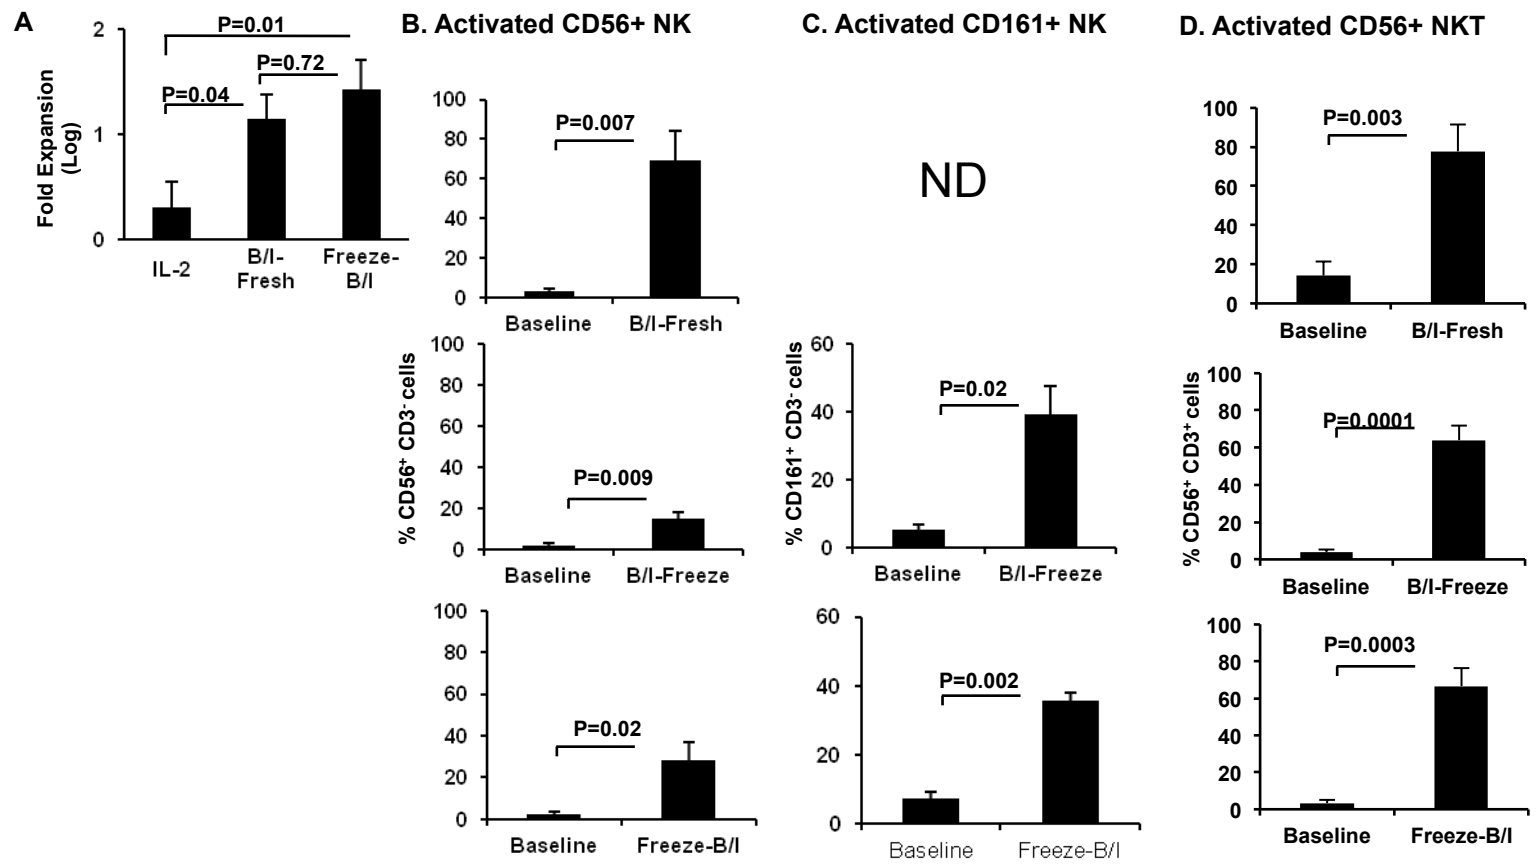

### E. Activated CD161+ NKT

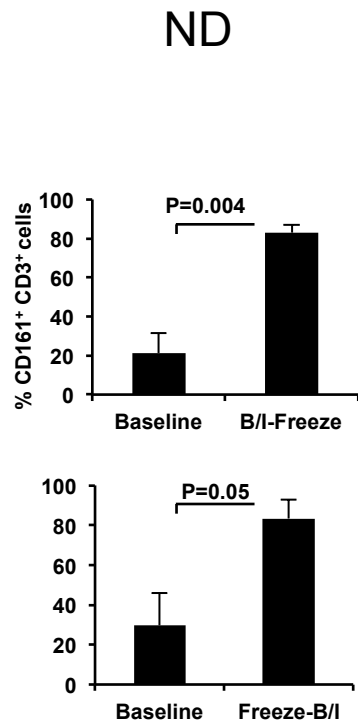

### F. CD3+ Cells

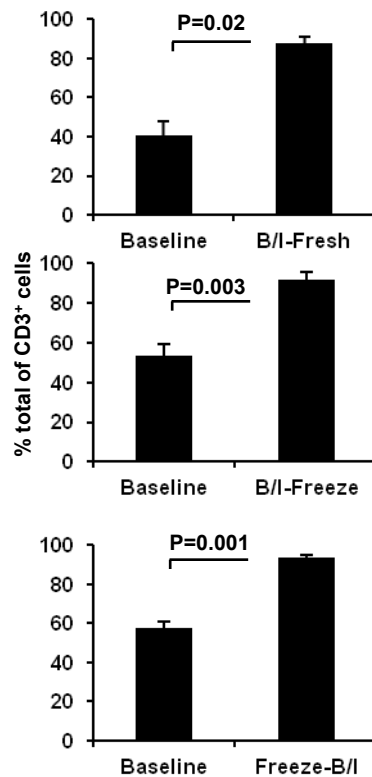

### G. Tm cells

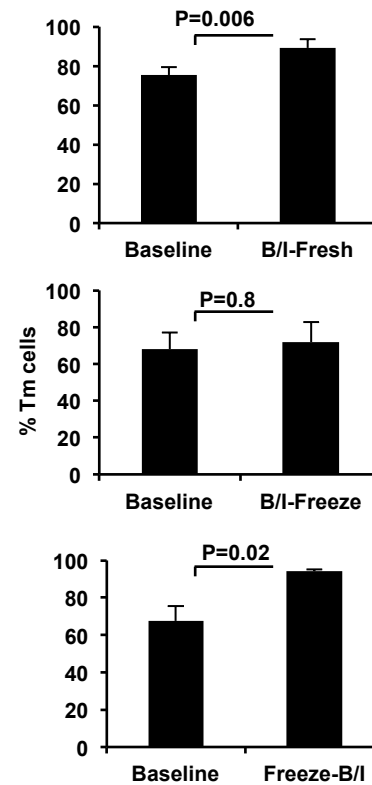

**Supplemental Figure 1. Determination of cryosensitivity of the reprogrammed cells.** A) Fold expansion compared to day one of IL-2 (n=13), B/I-Fresh (n=16) and Freeze-B/I (n=11) PBMCs. Cell counts were performed using trypan blue exclusion. Data represent Least Squares Means  $\pm$  SEM. B) The percentage of activated CD56+ NK cells was determined in reprogrammed cells which included B/I-Fresh (n=6), B/I-Freeze (n=9), and Freeze-B/I (n=8). C) The percentage of activated CD161+ NK cells was determined in B/I-Freeze (n=5), and Freeze-B/I (n=3). D) The percentage of activated CD56+ NKT cells was determined in B/I-Fresh (n=6), B/I-Freeze (n=9), and Freeze-B/I (n=8). E) The percentage of activated CD161+ NKT cells was determined in B/I-Freeze (n=5), and Freeze-B/I (n=3). F) The percentage of total CD3+ cells on gated lymphocyte region was determined in B/I-Fresh (n=5), B/I-Freeze (n=7), and Freeze-B/I PBMCs (n=8). G) The percentage of Tm cells was determined in B/I-Fresh (n=5), B/I-Freeze (n=7), and Freeze-B/I PBMCs (n=8). Data represent Mean  $\pm$  SEM. ND = not done.

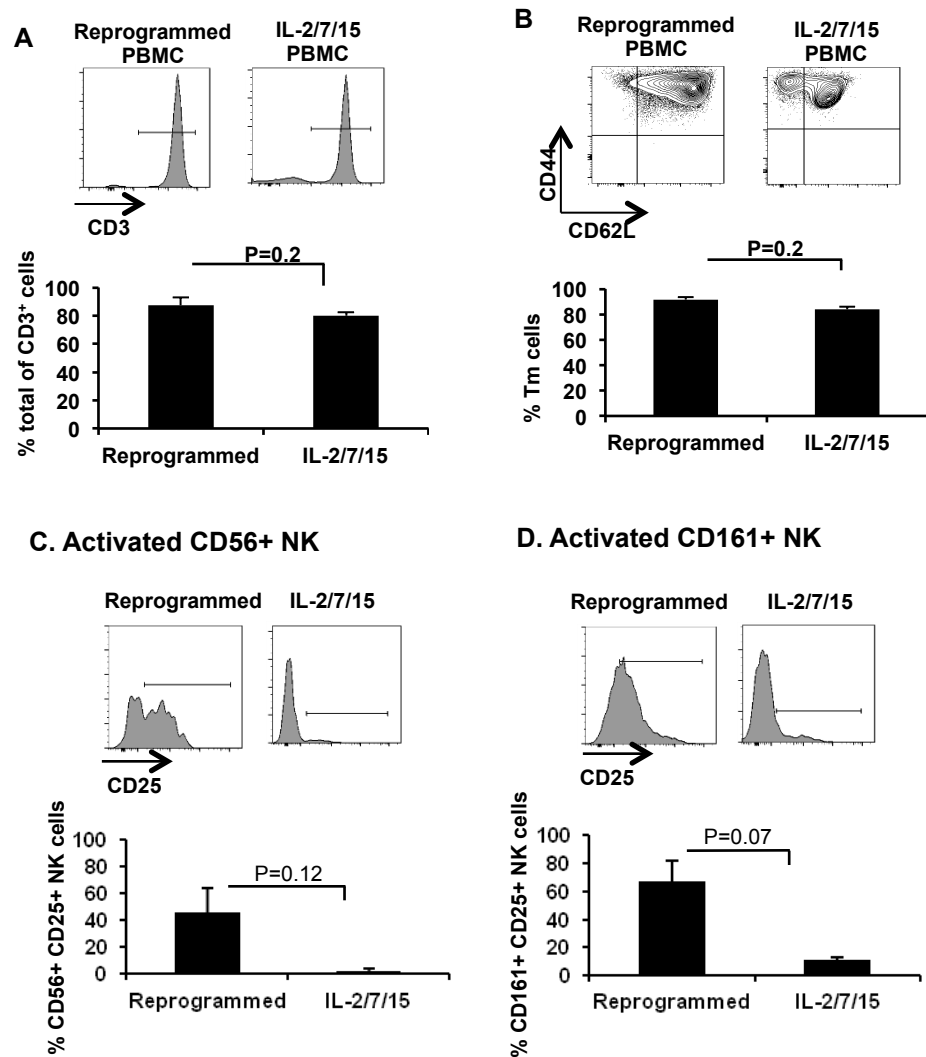

**Supplemental Figure 2. Determination of the role of B/I in cellular reprogramming.** PBMCs (n=3) were split into two groups and then subjected to reprogramming protocol in the presence (Reprogrammed PBMC) or absence (IL-2/7/15 PBMC) of B/I. The frequency of (A) total CD3<sup>+</sup> cells, (B) Tm cells, (C) activated CD56<sup>+</sup> NK cells, and (D) activated CD161<sup>+</sup> NK cells was determined in Reprogrammed and IL2/7/15 PBMCs using flow cytometry. Data represent Mean  $\pm$  SEM.

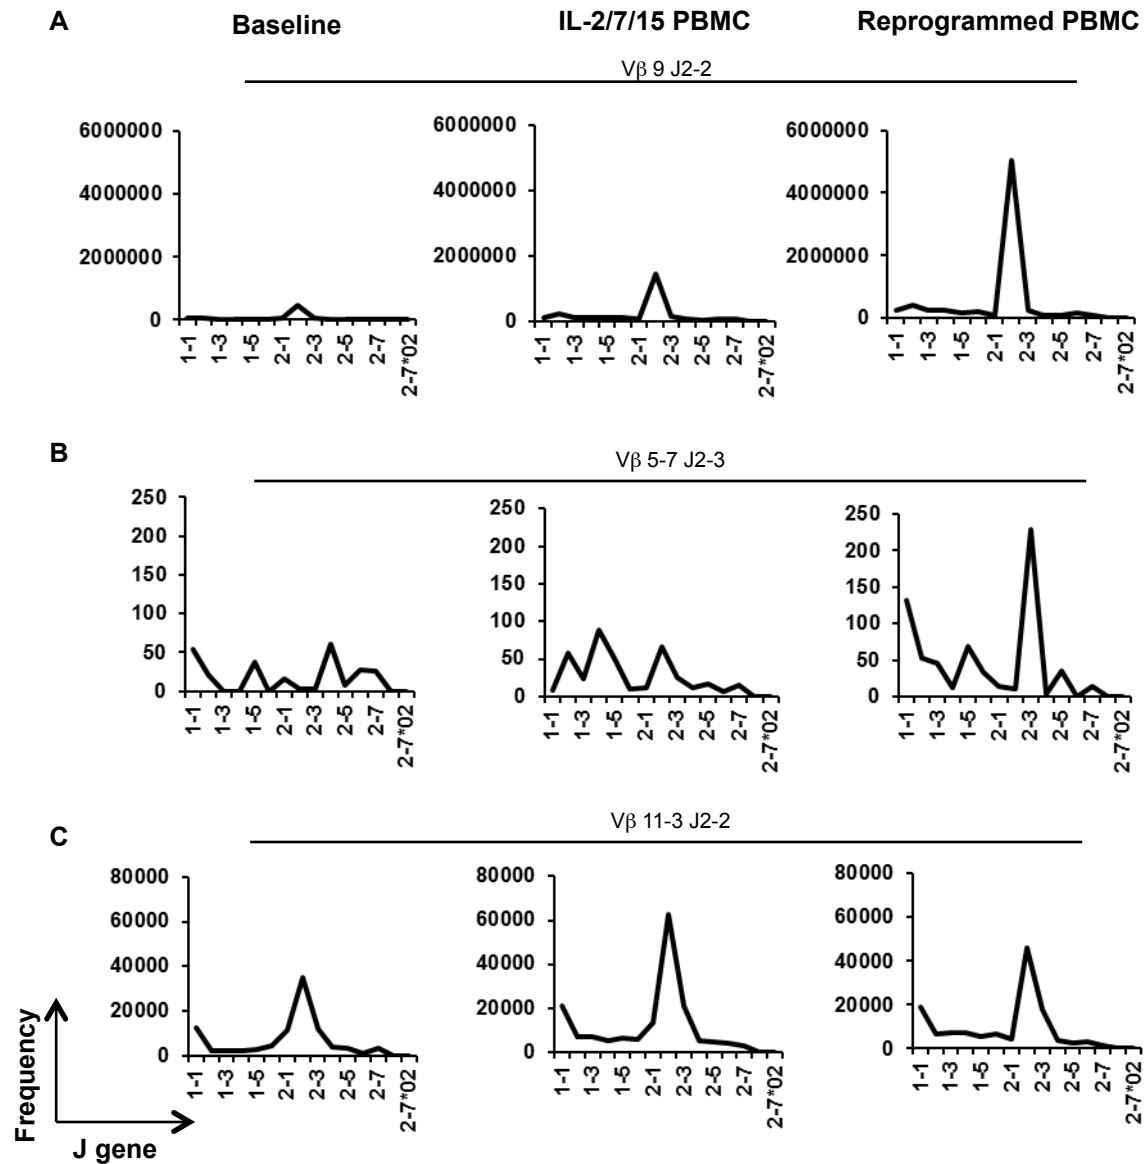

**Supplemental Figure 3. Bryostatins 1 and Ionomycin selectively expand specific T cell clones.** High-throughput sequencing of TcR V $\beta$  was performed from one patient's PBMCs at baseline, after culture with  $\gamma$ -c cytokines only (IL-2/7/15 PBMC), or after reprogramming with B/I and  $\gamma$ -c cytokines (Reprogrammed PBMC). Representative data for the effect of reprogramming on the expansion of dominant clone (A), skewed clonality (B), or no impact on specific clones (C).
